# Supplementary material for: Disentangling the drivers of future Antarctic ice loss with a historically-calibrated ice-sheet model
Source: Copernicus journal article supplement (doi:10.5194/egusphere-2023-1532), 2023-07-27
Supplement: Supplementary file [file egusphere-2023-1532-AC2-supplement.pdf]

## Author Response to Reviewer #2

### Disentangling the drivers of future Antarctic ice loss with a historically-calibrated ice-sheet model

Violaine Coulon, Ann Kristin Klose, Christoph Kittel, Tamsin Edwards, Fiona Turner, Ricarda Winkelmann, and Frank Pattyn  
*The Cryosphere*, <https://doi.org/10.5194/egusphere-2023-1532>

---

| Reviewer Comment, | Author Response, | <i>'changed manuscript text'</i> |
|-------------------|------------------|----------------------------------|
|-------------------|------------------|----------------------------------|

In this work, the authors use a set of ice sheet models calibrated to match the historical record for the Antarctic Ice Sheet and run an ensemble of simulations under different climate scenarios to try to extract the drivers of future Antarctic ice loss and contribution to sea level rise. In particular, they examine the varied roles that oceanic and atmospheric forcing play in the different climate scenarios. I found that the experiment was well thought-out, the results are clearly presented, and the paper itself was clearly written. I believe that this work represents a significant advance and is suitable for publication after a few minor issues are addressed.

Dear Daniel Martin,

Thank you very much for your thoughtful review of our manuscript and your valuable feedback. Please find our detailed point-by-point responses (in blue) to your comments (in black) below.

Overall, I am skeptical of the 16 km resolution used in this study. While the use of the Schoof criterion means that the method as a whole is somewhat impervious to resolution, there is some evidence that these sorts of approaches aren't the most accurate (i.e. [3]). That said, I suspect the model is sufficient for the broad-strokes purposes of this study.

We appreciate your comment regarding the model resolution and the use of a flux condition in our study. In response to your concerns, we have added a discussion in Appendix A, supported by a new figure (S12 in the supplementary material, shown below), which presents the model's performance for the MISMIP+ Ice 1 experiments (Cornford et al., 2020) at different spatial resolutions, including 1, 2, and 4-km. This analysis includes simulations both with and without the flux condition to assess grounding-line migrations. We hope that this additional information provides confidence that our model reliably tracks grounding-line migration, and that it aligns with the range of responses seen in other ice-sheet models employing various ice-flow approximations. For further details on this topic and other modifications of the revised manuscript related to model resolution, please refer to our response to Reviewer #1.

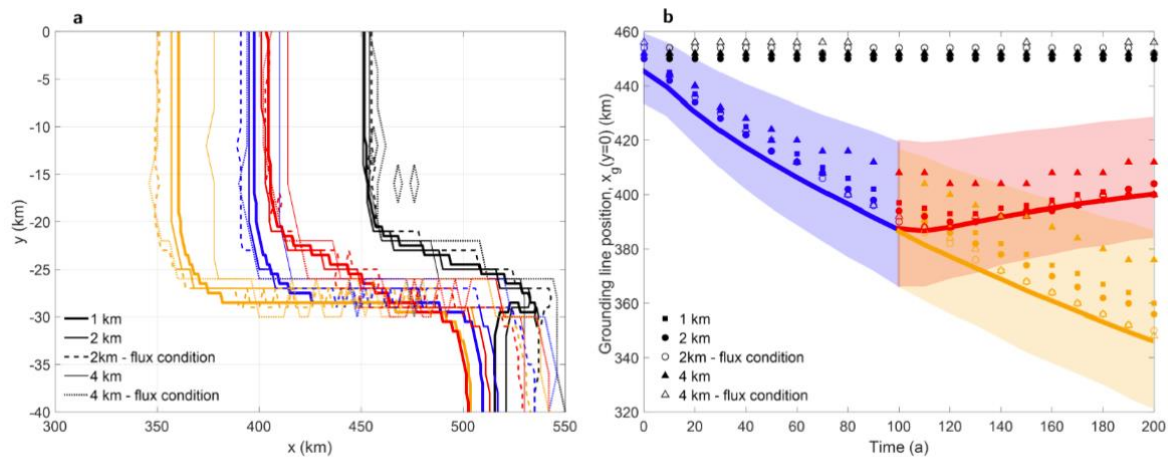

Figure S12: **Grounding-line positions for the MISIP+ Ice 1 experiments with Kori-ULB.** (a) Final grounding-line positions at the end of each step of the Ice 1 experiments within the MISIP+ ice stream domain, which is a rectangular domain spanning 640 km in the  $x$  direction and 80 km in the  $y$  direction. Ice flows in a direction roughly parallel to the  $x$  axis (with a mirror symmetry in the lateral center of the ice stream – midchannel position is at  $y = 0$ ). (b) Midchannel grounding line positions plotted against time for the Ice 1 experiments. A retrograde bed slope is observed between  $x = 400$  and  $x = 500$  km. All experiments are run at different spatial resolutions (1, 2 and 4 km), and with (at 2 and 4-km resolution only) and without using a flux-condition to determine grounding-line migrations. Black curves and symbols correspond to the Ice 0 (control) experiment. Blue curves and symbols correspond to the Ice 1r experiment (melt-induced retreat). Red curves and symbols correspond to the Ice 1ra experiment (no melting readvance). Finally, yellow curves and symbols correspond to the Ice 1rr experiment (further melt-induced retreat). More information on the experiments setup and the domain are provided in Cornford et al. (2020). Lines and shaded regions in (b) show the envelopes for the ‘main subset’ of MISIP+ models, copied from Cornford et al. (2020, their Fig. 7a).

## 2. Specific Points

1. **line 110:** I think the first use of the term “committed sea level rise” was in Price [2]

Thank you for your suggestion, we have included this reference.

2. **Figure 2:** The colormap used for probability is unfortunate in that the shading used to represent “no probability” is indistinguishable from the middle-scale shading (around 50% probability). Would a monochrome color scale make more sense here?

Thank you for noting the colormap issue in Figure 2. We have revised the colormap to ensure clarity.

3. **Figure 5:** The “present-day” (control) experiment would be useful to include in this figure for comparison purposes.

Thank you for your suggestion. We agree that including the “present-day” experiment for comparison is beneficial. However, to avoid clutter in Figure 5, we have displayed the mean thickness changes under constant present-day climate, SSP1-2.6 and SSP5-8.5 in Figure S4 in the supplementary material instead. We however added a statement in the caption of Figure 5 to guide readers to Figure S4 for comparison.

4. **Figure 6:** It would be clearer if you point out the components which have opposite signs with regard to contribution to SLR (for example, surface melt and runoff appear to be opposite signs). I think that using the conventions you’re using makes it easier to tell when SMB components balance, but you should make that clear in the caption.

Many thanks for the relevant remark. We have clarified the caption of Figure 6 by adding the following sentence:

*'Note that positive SMB, snow accumulation and rainfall fluxes represent mass gains while positive surface melt and runoff fluxes represent mass losses.'*

5. **lines 350-360: You should probably also mention hydrofracture as an impact of changes in SMB on ice shelves (which is a mechanism via which atmospheric forcing can mimic ocean forcing and its impacts on buttressing).**

Thank you for pointing this out. We have added the following statement at line 358:

*'This reduction in ice-shelf buttressing with near-surface warming is further expected to be amplified by the influence of surface runoff on ice-shelf breakup through hydrofracturing (as demonstrated in section 3.5).'*

6. **line 555: Is the assumption of spatially constant viscoelastic properties appropriate? I'm not an expert, but I've seen a fair bit of recent work on how soft the bedrock under WAIS is relative to the rest of the AIS, and its impacts on ice sheet dynamics. Amusingly, I can cite work by Coulon, et al to make this point.[1] If you feel that the model used here is reasonable, I think you need to justify that given the existence of a body of work which seems to suggest otherwise.**

We agree that recent evidence indicates the presence of a low mantle viscosity and thin lithosphere beneath West Antarctica, contributing to a stabilizing potential of the West Antarctic ice sheet. However, it is important to note that these lateral variabilities in Antarctic viscoelastic properties are associated with considerable uncertainties, as discussed in Coulon et al. (2021). Therefore, and given the primary focus of our study on uncertainties related to ice-ocean-atmosphere interactions as drivers of mass loss, we have chosen not to explicitly incorporate this effect (and associated uncertainties). Instead, we opted for the common simplifying assumption of a uniform solid Earth representative of the continental average. In future work, which will involve applying a similar Bayesian calibration approach to a broader ensemble of simulations, we plan to address these uncertainties in a more comprehensive manner. This expanded scope will no longer be exclusively focused on ice-climate interactions, allowing for a more detailed exploration of additional uncertainties, including those related to solid Earth properties. In particular, we intend to explore uncertainties in intra-regional viscoelastic heterogeneities using a compilation of 3-D viscosity profiles of the Antarctic solid Earth (not yet publicly available).

To address this, in our revised manuscript, we have

- included the following statement in the discussion (line 478) that acknowledges the potential influence of this assumption:

*'Accounting for the latter may therefore delay and/or reduce mass loss arising from West Antarctica (Whitehouse et al., 2019; Coulon et al., 2021). Future work will involve applying a similar Bayesian calibration approach to a broader ensemble of simulations sampling uncertainties no longer*

*exclusively focused on ice--climate interactions, allowing for a more detailed exploration of additional uncertainties.'*

- and added the following in Appendix A (line 556):

*‘,representative of the continental average (Le Meur and Huybrechts, 1996). We therefore did not account for the lateral variability nor the uncertainties in Antarctic viscoelastic properties (Whitehouse et al., 2019; Coulon et al., 2021).'*

7. **line 686 (code availability) – I think you need to specify a particular version of the code. Specifying a dev branch won't be sufficient to fully reproduce the results here.**

Thank you for your remark. The specific model version used in this study has been made available on Zenodo (10.5281/zenodo.8398772), in addition to access to the simulations outputs and associated scripts. The data acknowledgement section has therefore been updated as follows:

*‘The code and reference manual of Kori-ULB ice-sheet model are publicly available on GitHub via <https://github.com/FrankPat/Kori-dev>. The specific Kori-ULB model version used in this study, the simulations outputs and the scripts needed to produce the figures and tables, and the scripts are hosted on Zenodo (<https://doi.org/10.5281/zenodo.8398772>). All datasets used in this study are freely accessible through their original references. The CMIP6 forcing data used in this study are accessible through the CMIP6 search interface (<https://esgf-node.llnl.gov/search/cmip6/>). The MAR outputs used in this study are available on Zenodo (<https://doi.org/10.5281/zenodo.4459259>; Kittel et al., 2021)’*

### 3. Minor corrections and typos

1. **line 39: “compensate” – would “offset” be a better word here?**

Thanks, this has been changed.

2. **line 66: “allowing to quantify” → “allowing us to quantify”?**

Thanks, this has been changed.

3. **line 109: “allowing to investigate”...**

Thanks, this has been changed.

4. **line 111: “amount” → “number”**

Thanks, this has been changed.

5. **line 202: You use “Amundsen Sea Sector” here, while elsewhere you use “Amundsen Sea Embayment” – are they referring to the same region? If so, it would be better to be consistent.**

Yes, they are referring to the same region. Thanks for noticing, this has now been

changed.

6. **Figure 1 caption: “area represent” → either “areas represent” or “area represents”**

Thanks, this has been changed.

7. **line 334: “Figure... illustrate”**

Thanks, this has been changed.

8. **line 379: Should the reference to Figure 2D here be to 2a?**

Indeed. Thanks, this has been changed.

9. **Figure 7 caption: “aggregated fluxed” → “fluxes”**

Thanks, this has been changed.

In addition to the above, we would like to draw your attention to a correction made to Figure 1. We initially displayed the ensemble mean and standard deviation while our intention was to present the median and 5-95% probability interval. The revised version of the manuscript includes the corrected figure (shown below).

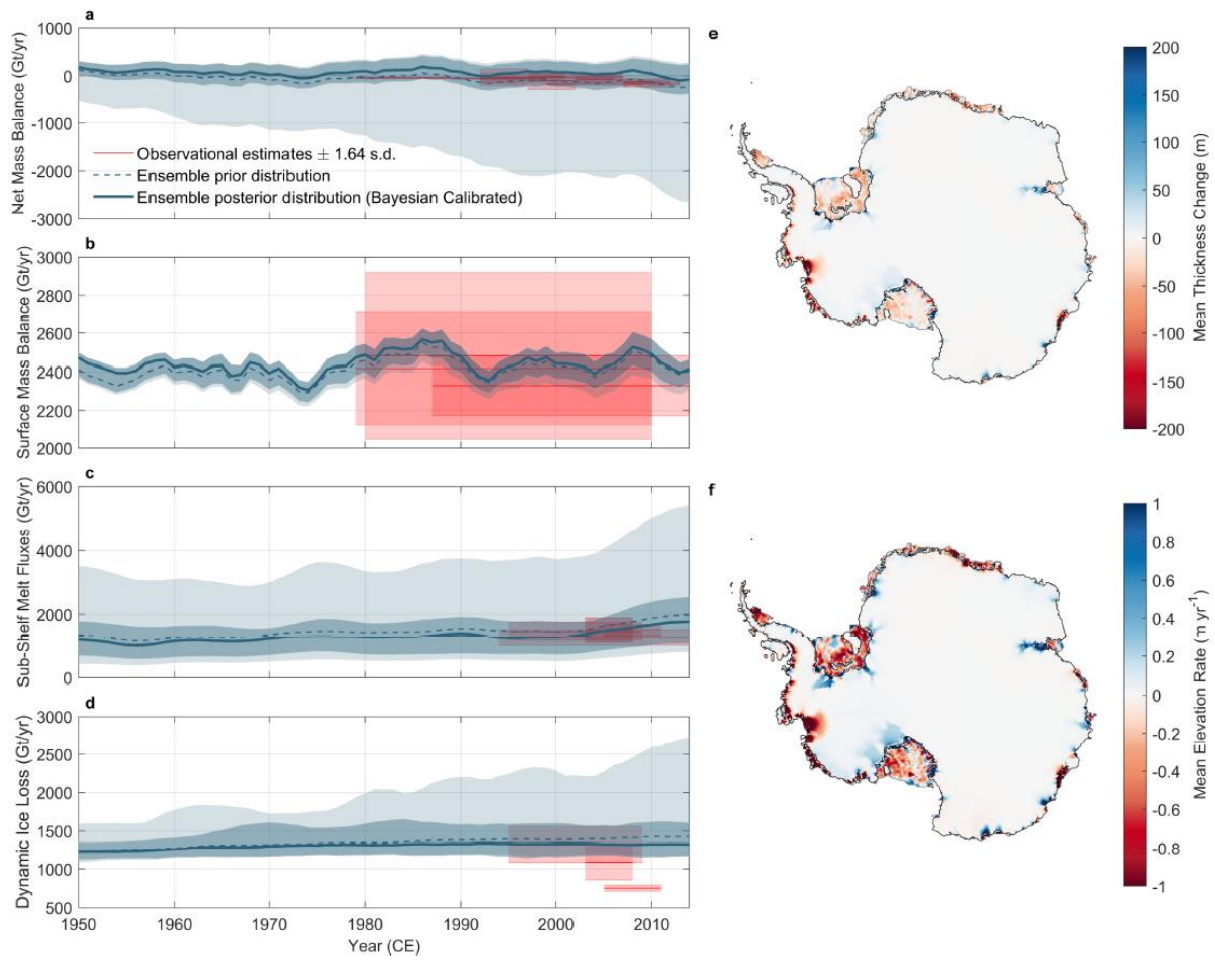

Best regards,

Violaine Coulon, on behalf of all co-authors.

## References:

Coulon, V., Bulthuis, K., Whitehouse, P. L., Sun, S., Haubner, K., Zipf, L., and Pattyn, F.: Contrasting Response of West and East Antarctic Ice Sheets to Glacial Isostatic Adjustment, *Journal of Geophysical Research: Earth Surface*, 126, e2020JF006 003, <https://doi.org/10.1029/2020JF006003>, 2021.

Cornford, S. L., Seroussi, H., Asay-Davis, X. S., Gudmundsson, G. H., Arthern, R., Borstad, C., Christmann, J., Dias dos Santos, T., Feldmann, J., Goldberg, D., Hoffman, M. J., Humbert, A., Kleiner, T., Leguy, G., Lipscomb, W. H., Merino, N., Durand, G., Morlighem, M., Pollard, D., Rückamp, M., Williams, C. R., and Yu, H. (2020). Results of the third Marine Ice Sheet Model Intercomparison Project (MISMIP+). *The Cryosphere*, 14(7):2283–2301. doi:10.5194/tc-14-2283-2020

Le Meur, E. and Huybrechts, P.: A comparison of different ways of dealing with isostasy: examples from modelling the Antarctic ice sheet during the last glacial cycle, *Annals of Glaciology*, 23, 309–317, <https://doi.org/10.1017/epic.12717.d001>, 1996.

Whitehouse, P. L., Wiens, D. A., Gomez, N., and King, M. A.: Solid Earth change and the evolution of the Antarctic Ice Sheet, *Nature Communications*, pp. 1–14, <https://doi.org/10.1038/s41467-018-08068-y>, 2019.
